# Supplementary material
Source: publisher figshare collection journal article supplement (https://tandf.figshare.com/articles/dataset/_/1494592)
Supplement: Supplementary file 1 [file 4]

**Supplemental material**


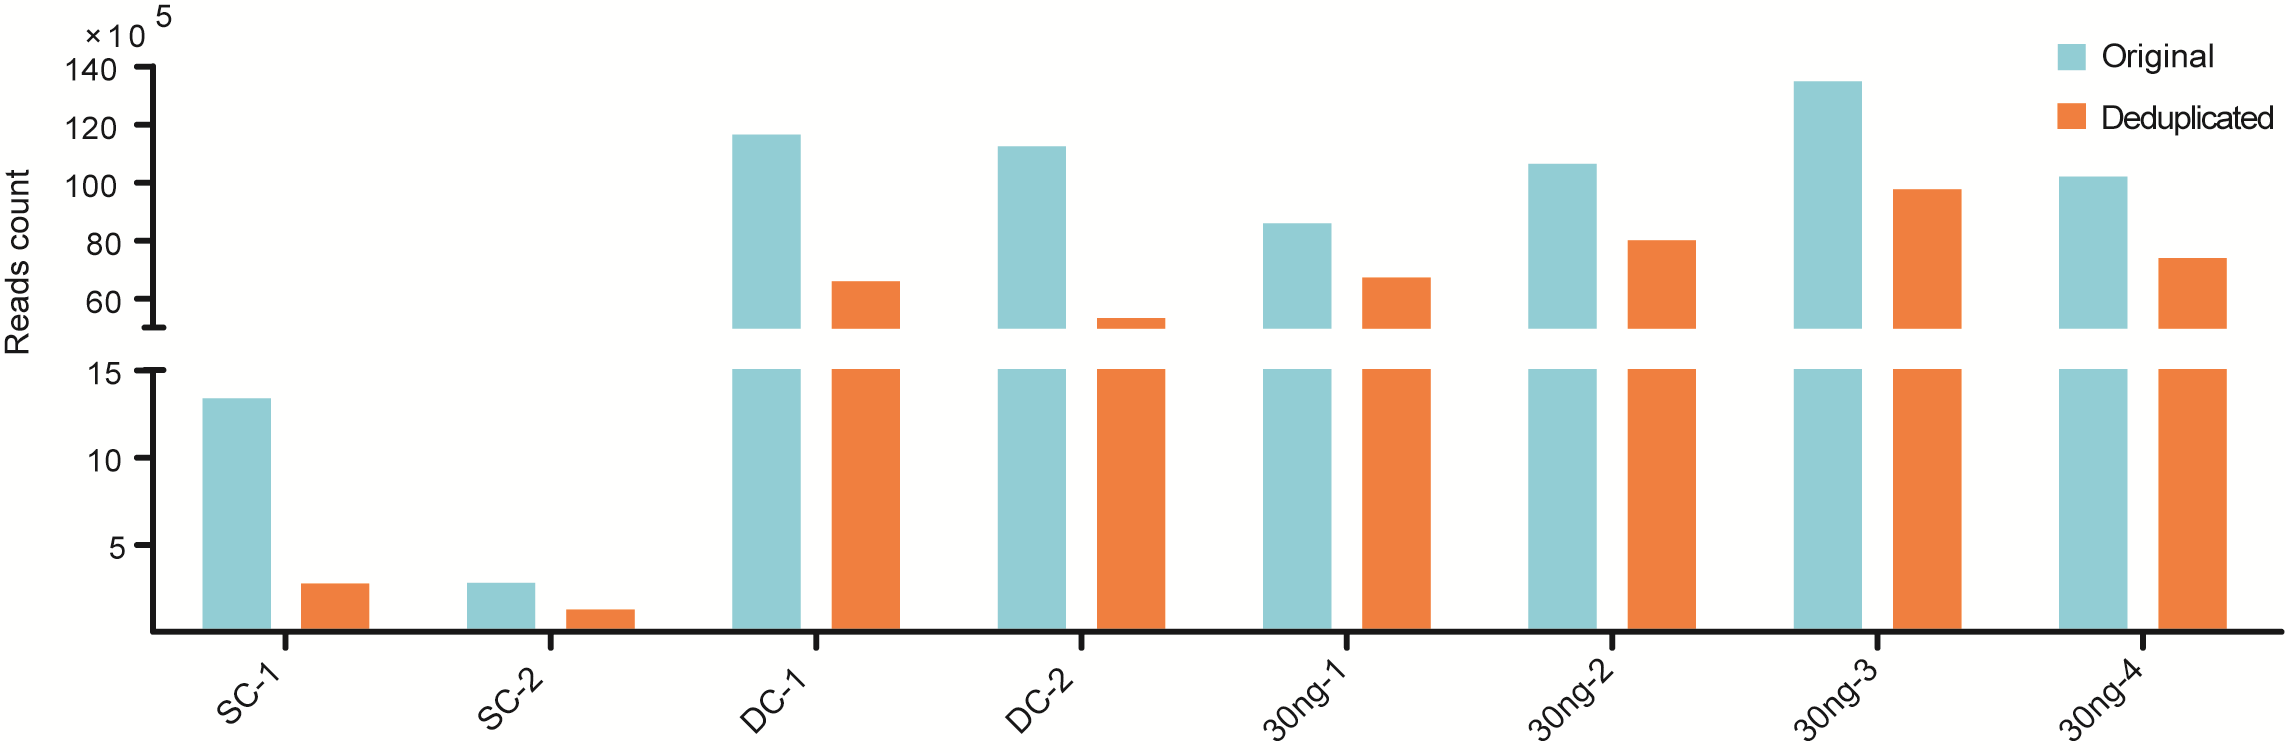


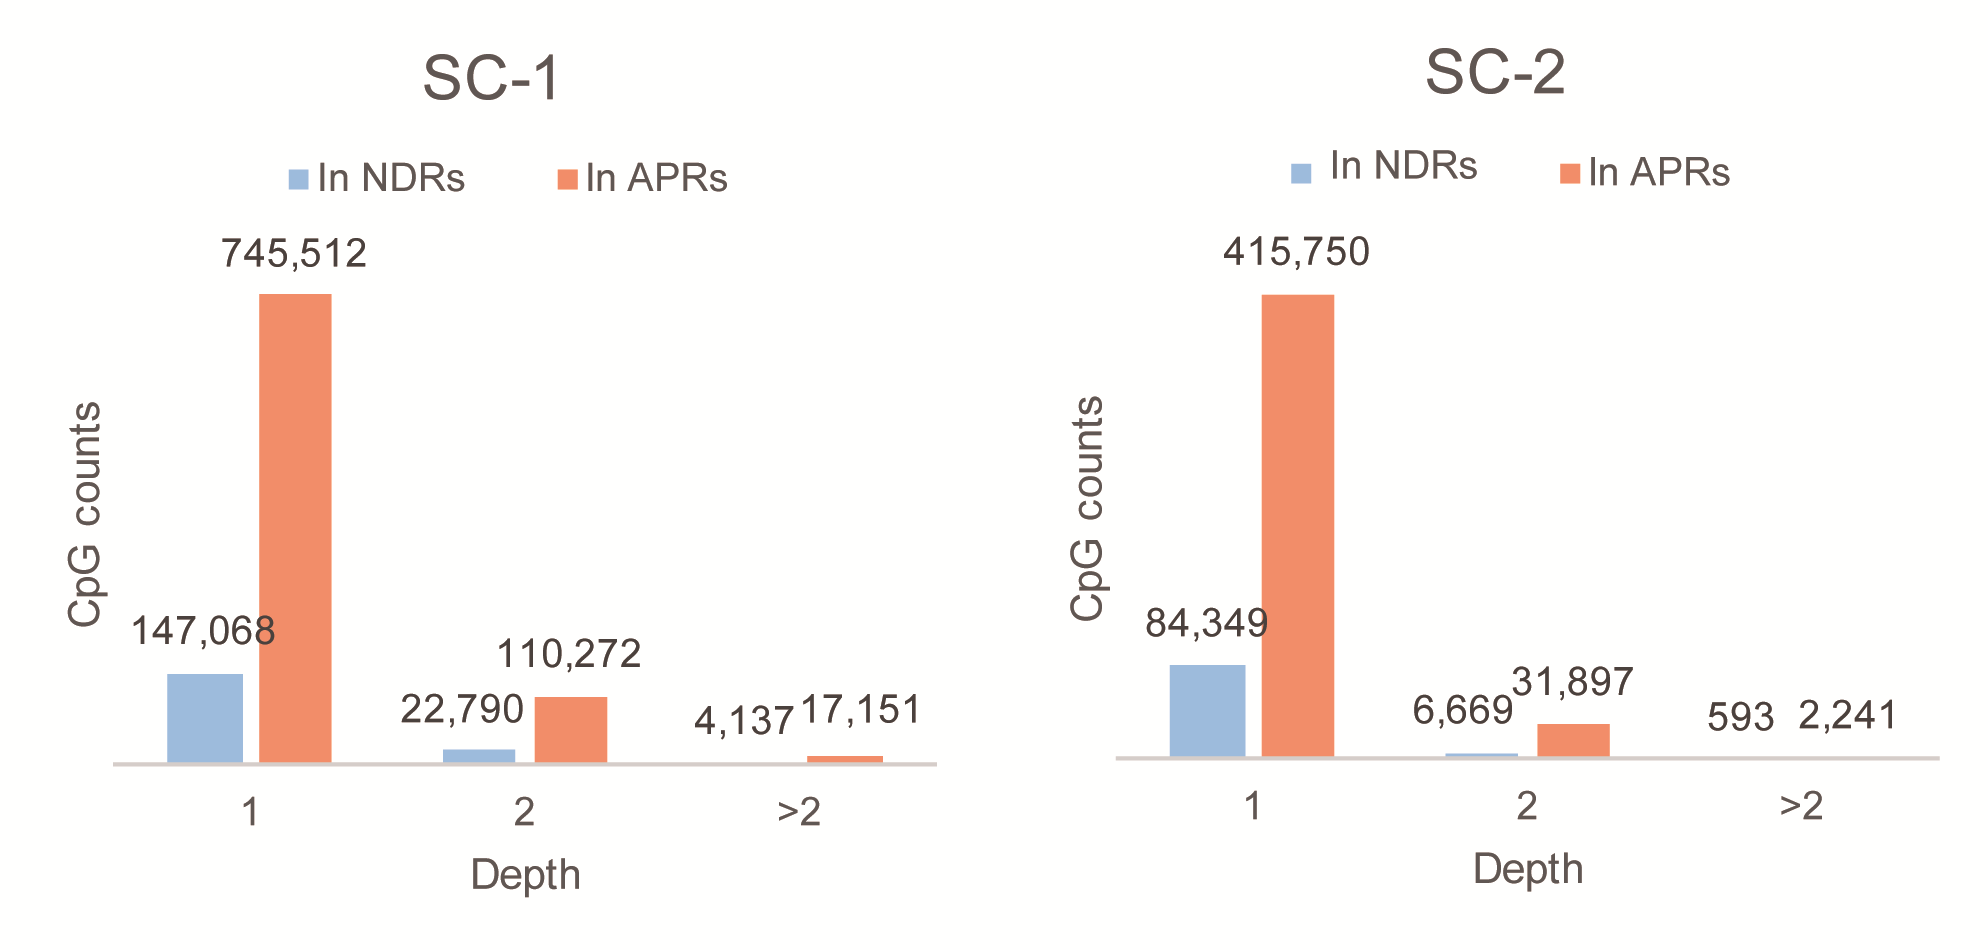
**Figure S1.** Bar plots of original (blue) and deduplicated (orange) read counts for each sample dataset. SC and DC represent single-cell and dozens-of-cells samples, respectively.

**Figure S2.** Counts of CpGs in abnormal polyploid regions (APRs; copy number > 2, orange) and normal diploid regions (NDRs; blue) at different coverage depths for single-cell samples (SC-1/2).

**
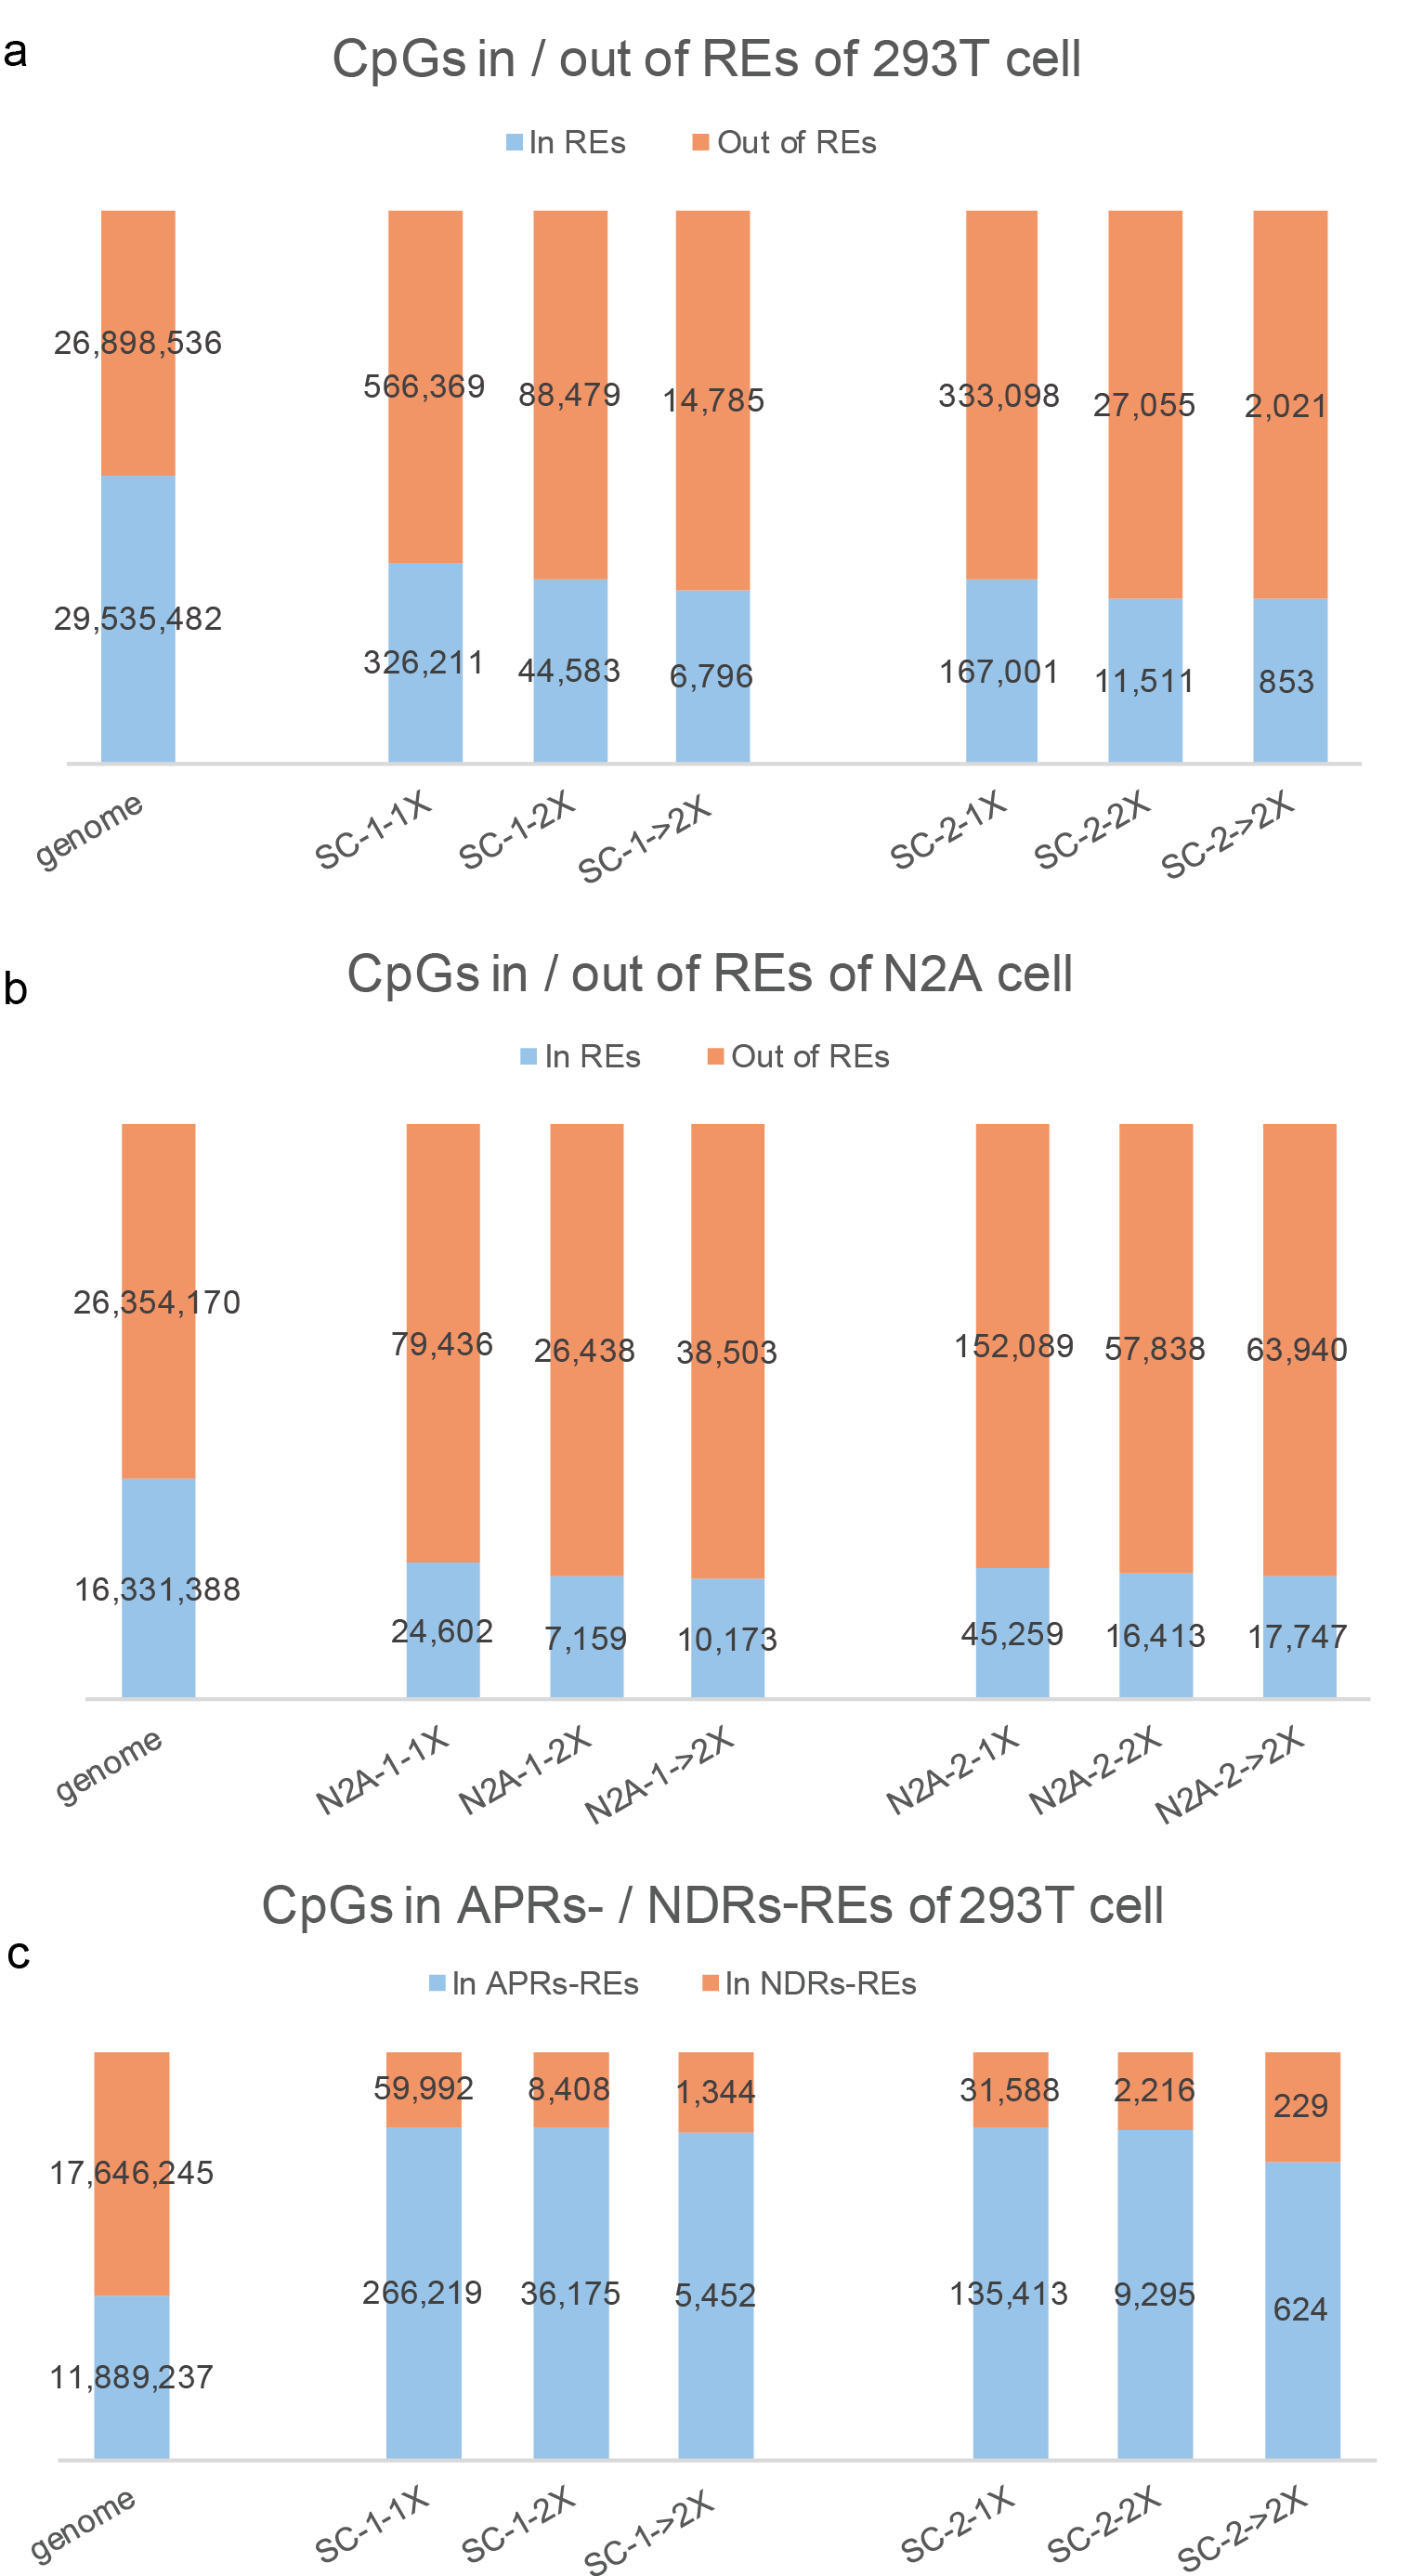
**

**Figure S3.** a-b. Coverage at different depths of total CpGs within repetitive elements (REs; blue) and outside REs (i.e., in regions lacking REs; orange) in the data obtained for HEK293T (human) and N2A (mouse) single-cell samples, as determined using Q-RRBS. c. Coverage at different depths of total CpGs in APR-REs (blue) or NDR-REs (orange) of HEK293T cells, as determined using Q-RRBS.

**
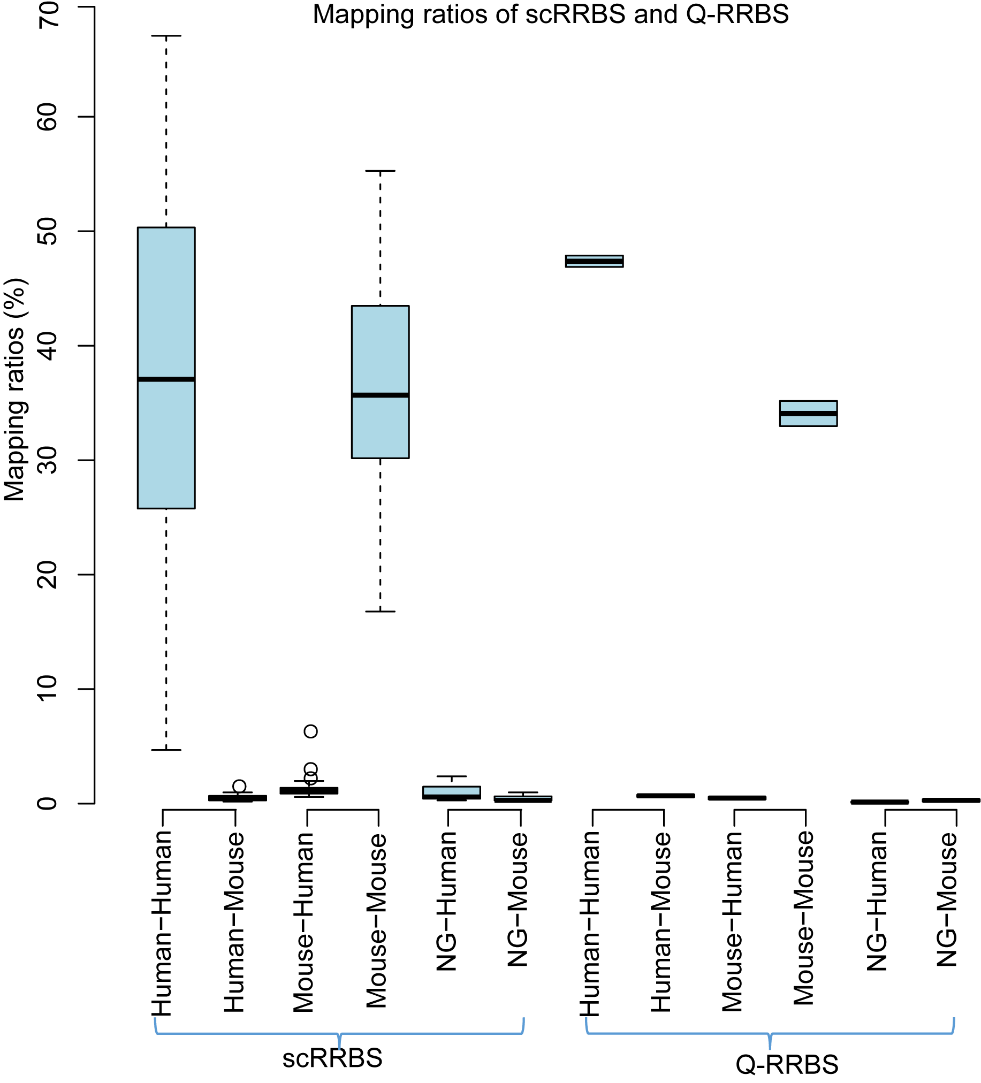
**

**Figure S4.** Box plots of the mapping ratios in scRRBS data and our Q-RRBS data. “Human-Human” and “Human-Mouse” represent human original reads mapped to human and mouse reference genomes, respectively. “Mouse-Human” and “Mouse-Mouse” represent mouse original reads mapped to human and mouse reference genomes, respectively. “NG-Human” and “NG-Mouse” represent negative-control original reads mapped to human and mouse reference genomes, respectively.

**References**

1. Guo H, Zhu P, Wu X, Li X, Wen L, Tang F. Single-cell methylome landscapes of mouse embryonic stem cells and early embryos analyzed using reduced representation bisulfite sequencing. Genome research 2013; 23:2126-35.

2. Guo H, Zhu P, Yan L, Li R, Hu B, Lian Y, Yan J, Ren X, Lin S, Li J, et al. The DNA methylation landscape of human early embryos. Nature 2014; 511:606-10.

Supplemental Table Captions

Table S1. Statistics of Q-RRBS.

Table S2. The list of the filtered ASM regions covered in our Q-RRBS of 293T cells, including the chromosome positions, number of covered CpGs.

Table S3. Adapter oligonucleotides and primer sequences.

Table S4. Mapping information of Q-RRBS in N2A cell line (a mouse cell) and negative control (NG, without cell).
